# Supplementary material for: Two-Month Voluntary Ethanol Consumption Promotes Mild Neuroinflammation in the Cerebellum but Not in the Prefrontal Cortex, Hippocampus, or Striatum of Mice
Source: MDPI journal article supplement (doi:10.3390/ijms25084173), 2024-04-10
Supplement: s1 [file s1]

**SUPPLEMENTARY TABLE 1**

| Gene          | Forward primer                  | Reverse primer                | Efficiency |
|---------------|---------------------------------|-------------------------------|------------|
| MCP1          | 5'-CCAGCAAGATGATCCCAATG-3'      | 5'-TCTGGACCCATTCTTCTTG-3'     | 0.942      |
| GAPDH         | 5'-TGGAGAAACCTGCCAAGTATGA-3'    | 5'-TGGAGAAGTGGGAGTTGCTGT-3'   | 1.000      |
| Iba1          | 5'-CCGAGGAGACGTTTCAGCTAC-3'     | 5'-GACATCCACCTCCAATCAGG-3'    | 0.965      |
| IL6           | 5'-TTCCATCCAGTTGCCTTCTTG-3'     | 5'-TATCCTCTGTGAAGTCTCCTCTC-3' | 0.984      |
| IL-1 $\beta$  | 5'-TCGCTCAGGGTCACAAGAAA-3'      | 5'-CATCAGAGGCAAGGAGGAAAAC-3'  | 0.941      |
| TNF $\alpha$  | 5'-CATCTTCTCAAAATTCGAGTGACAA-3' | 5'-TGGGAGTAGACAAGGTACAACCC-3' | 0.933      |
| COX2          | 5'-GAAGTCTTTGGTCTGGTGCCT-3'     | 5'-GCTCCTGCTTGAGTATGTGCG-3'   | 0.970      |
| TLR4          | 5'-TCAGAACTTCAGTGGCTGGA-3'      | 5'-AGAGGTGGTGTAAGCCATGC-3'    | 0.971      |
| CCR2          | 5'-GTGTACATAGCAACAAGCCTCAAAG-3' | 5'-CCCCACATAGGGATCATGA-3'     | 0.946      |
| MIP1 $\alpha$ | 5'-ATATGGAGCTGACACCCCGA-3'      | 5'-TCAACGATGAATTGGCGTGG-3'    | 0.963      |
| MCP5          | 5'-TATTGGCTGGACCAGATGCGG-3'     | 5'-ACACTGGCTGCTTGATTCT-3'     | 0.965      |
| CXCL2         | 5'-CCCAGACAGAAGTCATAGCCAC-3'    | 5'-TGGTTCTTCCGTTGAGGGAC-3'    | 0.966      |

**Supplementary Table 1. Forward and reverse primers used in this study.** Efficiency was calculated using the following equation:  $E = -1 + 10(-1/\text{slope})$ , where the slope was obtained from the linear regression of Ct v/s log[DNA] using four 10-fold dilutions of cDNA obtained from the PCR product of the experiments conducted in the study. Assays included PCR product dilutions from 1/1.000.000 to 1/1.000.000.000, prepared in serial dilutions, and assayed in duplicate.

**SUPPLEMENTARY TABLE 2**

| Name            | Sequence                               |                |            |
|-----------------|----------------------------------------|----------------|------------|
| miLinker        | pp(r)A.GGCCGAACCTACGACCTGCATAAACGG.ddC |                |            |
| miQRT           | 5'- CCCAGTTATGGCCGTTTATGCAGGT-3'       |                |            |
| Upm2a           | 5'- CCCAGTTATGGCCGTTTA-3'              |                |            |
| Gene            | Forward primer                         | Reverse primer | Efficiency |
| mmu-miR-21a-5p  | 5'-GCTTATCAGACTGATGTTGAGGC-3'          | Upm2a          | 0.991      |
| mmu-miR-146a-5p | 5'-GAGAACTGAATTCCATGGGTTG-3'           | Upm2a          | 0.995      |
| mmu-miR-155-5p  | 5'-TTAATGCTAATTGTGATAGGGGTG-3'         | Upm2a          | 0.945      |
| mmu-Let-7d-5p   | 5'-AGAGGTAGTAGGTTGCATAGTTG-3'          | Upm2a          | 0.984      |
| RNU6            | 5'-GCAAGGATGACACGCAAATT-3'             | Upm2a          | 1.000      |

**Supplementary Table 2. MiQPCR sequences and primers used in this study.** Efficiency was calculated using the following equation:  $E = -1 + 10(-1/\text{slope})$ , where the slope was obtained from the linear regression of Ct v/s log[DNA] using four 10-fold dilutions of cDNA obtained from the PCR product of the experiments conducted in the study. Assays included PCR product dilutions from 1/1.000.000 to 1/1.000.000.000, prepared in serial dilutions, and assayed in duplicate.
